# Supplementary material for: Procaryotic Diversity and Hydrogenotrophic Methanogenesis in an Alkaline Spring (La Crouen, New Caledonia)
Source: MDPI journal article supplement (doi:10.3390/microorganisms9071360), 2021-06-23
Supplement: s1 [file s1]

**Table S1. Chemical composition of the bath water CANBW at La Crouen spring (New Caledonia).**

| Source                         | This work        | Cox et al., 1982 |
|--------------------------------|------------------|------------------|
| Na (mM)                        | 2.24             | 2.41             |
| K (μM)                         | 30               | 0.05             |
| Ca (μM)                        | 35               | 0.03             |
| Mg (μM)                        | 0.64             | 8.23             |
| Sr (μM)                        | 4.41             | ND <sup>3</sup>  |
| Ba (nM)                        | 24               | ND <sup>3</sup>  |
| Si (mM)                        | 0.81             | 1.00             |
| DIC as Cinorg (mM)             | 1.36             | 0.34             |
| NPOC as Corg (mM) <sup>1</sup> | 0.05             | ND <sup>3</sup>  |
| Cl (mM)                        | 0.24             | 0.34             |
| SO <sub>4</sub> (mM)           | 0.16             | 0.15             |
| NO <sub>3</sub> (μM)           | 0.44             | ND <sup>3</sup>  |
| F (μM)                         | 23.63            | ND <sup>3</sup>  |
| PO <sub>4</sub> (μM)           | 0.30             | ND <sup>3</sup>  |
| N <sub>2</sub> (μM)            | 363              | ND <sup>3</sup>  |
| H <sub>2</sub> (μM)            | BDL <sup>2</sup> | ND <sup>3</sup>  |
| CH <sub>4</sub> (μM)           | BDL <sup>2</sup> | ND <sup>3</sup>  |
| O <sub>2</sub> (μM)            | 54               | ND <sup>3</sup>  |
| CO <sub>2</sub> (μM)           | BD <sup>2</sup>  | ND <sup>3</sup>  |

<sup>1</sup> NPOC: Non Purgeable Organic Carbon

<sup>2</sup> BDL: Below detection limit

<sup>3</sup> ND: Not determined

**Table S2. Blast analysis on the dominant proteobacterial OTUs (>1% of total sequences in at least on sample) obtained from La Crouen spring.**

| OTUs<br>(Accession<br>number) | Closest cultivated relative retrieved from NCBI nucleotide database |                                                                           |                 | % of sequences per samples |        |        |        |        |        |        |        |        |        |        |        |
|-------------------------------|---------------------------------------------------------------------|---------------------------------------------------------------------------|-----------------|----------------------------|--------|--------|--------|--------|--------|--------|--------|--------|--------|--------|--------|
|                               | Species (Accession<br>number)                                       | Taxonomy (Proteobacterial class, order, family)                           | Identity<br>(%) |                            |        |        |        |        |        |        |        |        |        |        |        |
|                               |                                                                     |                                                                           |                 | CANBS1                     | CANBS2 | CANBW1 | CANBW2 | CANPS1 | CANPS2 | CANPW1 | CANPW2 | CANAS1 | CANAS2 | CANAW1 | CANAW2 |
| OTU_181<br>(MW801419)         | <i>Aquaspirillum serpens</i><br>(AB680863)                          | <i>Betaproteo.</i> ; <i>Neisseriales</i> ; <i>Chromobacteriaceae</i>      | 99              | 1.1                        | 0.5    | 0.0    | 0.0    | 0.0    | 0.0    | 0.0    | 0.0    | 0.1    | 0.0    | 0.3    | 0.4    |
| OTU_5158<br>(MW801426)        | <i>Methyloversatilis</i> sp. DMSP-<br>7 (KC860260)                  | <i>Betaproteo.</i> ; <i>Nitrosomonadales</i> ; <i>Sterolibacteriaceae</i> | 97              | 0.3                        | 0.3    | 4.6    | 4.4    | 4.2    | 5.7    | 7.4    | 6.8    | 1.1    | 1.7    | 0.4    | 0.4    |
| OTU_2<br>(MW801389)           | <i>Ca. Desulfobacillus</i><br><i>denitrificans</i> (AP021857)       | <i>Betaproteo.</i> ; <i>Candidatus Desulfobacillus</i>                    | 99              | 0.8                        | 0.7    | 9.9    | 10.1   | 12.5   | 13.6   | 16.0   | 18.1   | 3.0    | 4.2    | 1.1    | 1.2    |
| OTU_25154<br>(MW801433)       | <i>Ca. Desulfobacillus</i><br><i>denitrificans</i> (AP021857)       | <i>Betaproteo.</i> ; <i>Candidatus Desulfobacillus</i>                    | 97              | 0.4                        | 0.4    | 5.4    | 5.4    | 6.4    | 7.7    | 8.9    | 10.0   | 1.7    | 2.5    | 0.5    | 0.5    |
| OTU_25205<br>(MW801434)       | <i>Ca. Desulfobacillus</i><br><i>denitrificans</i> (AP021857)       | <i>Betaproteo.</i> ; <i>Candidatus Desulfobacillus</i>                    | 97              | 0.2                        | 0.1    | 2.3    | 2.1    | 2.3    | 3.2    | 3.5    | 3.6    | 0.7    | 1.0    | 0.3    | 0.2    |
| OTU_25375<br>(MW801435)       | <i>Ca. Desulfobacillus</i><br><i>denitrificans</i> (AP021857)       | <i>Betaproteo.</i> ; <i>Candidatus Desulfobacillus</i>                    | 97              | 0.0                        | 0.0    | 0.7    | 0.8    | 0.9    | 1.0    | 1.3    | 1.6    | 0.2    | 0.4    | 0.1    | 0.1    |
| OTU_14298<br>(MW801429)       | <i>Ca. Desulfobacillus</i><br><i>denitrificans</i> (AP021857)       | <i>Betaproteo.</i> ; <i>Candidatus Desulfobacillus</i>                    | 97              | 0.0                        | 0.0    | 0.2    | 0.4    | 2.1    | 1.3    | 0.4    | 0.4    | 0.2    | 0.2    | 0.1    | 0.1    |
| OTU_7706<br>(MW801427)        | <i>Sulfurisoma sediminicola</i><br>(NR_125471)                      | <i>Betaproteo.</i> ; <i>Nitrosomonadales</i> ; <i>Sterolibacteriaceae</i> | 96              | 0.0                        | 0.0    | 0.1    | 0.1    | 1.5    | 1.0    | 0.1    | 0.1    | 0.2    | 0.2    | 0.1    | 0.1    |
| OTU_6<br>(MW801390)           | <i>Hydrogenophaga atypica</i><br>(MG712818)                         | <i>Betaproteo.</i> ; <i>Burkholderiales</i> ; <i>Comamonadaceae</i>       | 99              | 0.2                        | 0.2    | 4.2    | 3.3    | 0.3    | 0.3    | 0.2    | 0.2    | 0.4    | 0.3    | 0.4    | 0.4    |
| OTU_15795<br>(MW801430)       | <i>Hydrogenophaga aquatica</i><br>(NR_158120)                       | <i>Betaproteo.</i> ; <i>Burkholderiales</i> ; <i>Comamonadaceae</i>       | 99              | 0.1                        | 0.0    | 2.4    | 1.8    | 0.0    | 0.0    | 0.0    | 0.0    | 0.1    | 0.1    | 0.1    | 0.1    |
| OTU_2358<br>(MW801425)        | <i>Vogesella indigofera</i><br>(MG011571)                           | <i>Betaproteo.</i> ; <i>Neisseriales</i> ; <i>Chromobacteriaceae</i>      | 95              | 0.4                        | 0.1    | 0.1    | 0.1    | 0.5    | 0.3    | 0.1    | 0.1    | 6.9    | 3.4    | 0.2    | 0.2    |
| OTU_11<br>(MW801393)          | <i>Desulfomonile liminaris</i><br>(NR_025079)                       | <i>Deltaproteo.</i> ; <i>Syntrophobacterales</i> ; <i>Syntrophaceae</i>   | 85              | 0.0                        | 0.0    | 6.2    | 5.0    | 0.1    | 0.0    | 10.3   | 6.8    | 0.0    | 0.0    | 0.1    | 0.1    |
| OTU_154<br>(MW801415)         | <i>Alkalilimnicola ehrlichii</i><br>MLHE-1 (CP000453)               | <i>Gammaproteo.</i> ; <i>Chromatiales</i> ; <i>Ectothiorhodospiraceae</i> | 94              | 2.5                        | 2.9    | 0.0    | 0.0    | 0.0    | 0.0    | 0.0    | 0.0    | 0.5    | 0.6    | 0.0    | 0.0    |
| OTU_10<br>(MW801392)          | <i>Thiofaba tepidiphila</i><br>(NR_041602)                          | <i>Gammaproteo.</i> ; <i>Chromatiales</i> ; <i>Halothiobacillaceae</i>    | 96              | 0.3                        | 0.1    | 4.8    | 5.6    | 20.4   | 10.7   | 2.5    | 2.1    | 2.4    | 2.2    | 17.2   | 18.7   |
| OTU_23277<br>(MW801432)       | <i>Thiofaba tepidiphila</i><br>(NR_041602)                          | <i>Gammaproteo.</i> ; <i>Chromatiales</i> ; <i>Halothiobacillaceae</i>    | 94              | 0.1                        | 0.0    | 1.3    | 1.5    | 6.4    | 2.9    | 0.7    | 0.6    | 0.7    | 0.7    | 5.2    | 5.2    |
| OTU_25557<br>(MW801436)       | <i>Thiofaba tepidiphila</i><br>(NR_041602)                          | <i>Gammaproteo.</i> ; <i>Chromatiales</i> ; <i>Halothiobacillaceae</i>    | 93              | 0.1                        | 0.0    | 0.4    | 0.7    | 1.2    | 1.4    | 0.1    | 0.1    | 0.1    | 0.1    | 1.9    | 1.8    |
| OTU_77<br>(MW801402)          | <i>Thiovirga sulfuroxydans</i><br>(NR_040986)                       | <i>Gammaproteo.</i> ; <i>Chromatiales</i> ; <i>Halothiobacillaceae</i>    | 97              | 0.0                        | 0.0    | 0.2    | 0.1    | 0.0    | 0.0    | 0.0    | 0.0    | 0.1    | 0.0    | 6.3    | 2.1    |
| OTU_16702<br>(MW801431)       | <i>Thiovirga sulfuroxydans</i><br>(NR_040986)                       | <i>Gammaproteo.</i> ; <i>Chromatiales</i> ; <i>Halothiobacillaceae</i>    | 98              | 0.0                        | 0.0    | 0.1    | 0.1    | 0.0    | 0.0    | 0.0    | 0.0    | 0.0    | 0.0    | 2.1    | 1.4    |
| OTU_209<br>(MW801423)         | <i>Thiovirga sulfuroxydans</i><br>(NR_040986)                       | <i>Gammaproteo.</i> ; <i>Chromatiales</i> ; <i>Halothiobacillaceae</i>    | 94              | 0.2                        | 0.1    | 0.1    | 0.1    | 0.1    | 0.1    | 0.0    | 0.0    | 0.2    | 0.0    | 1.9    | 0.9    |
| OTU_1<br>(MW801388)           | <i>Pseudomonas putida</i><br>(MG846038)                             | <i>Gammaproteo.</i> ; <i>Pseudomonadales</i> ; <i>Pseudomonadaceae</i>    | 99              | 0.9                        | 0.1    | 3.2    | 4.8    | 1.7    | 0.1    | 2.7    | 4.7    | 0.9    | 0.1    | 0.4    | 0.4    |
| OTU_194<br>(MW801422)         | <i>Thiothrix disciformis</i><br>(NR_118037)                         | <i>Gammaproteo.</i> ; <i>Thiotrichales</i> ; <i>Thiotrichaceae</i>        | 96              | 0.0                        | 0.0    | 0.0    | 0.0    | 0.0    | 0.0    | 0.0    | 0.0    | 0.1    | 0.1    | 0.9    | 1.4    |

**Table S3. Blast analysis on the dominant non-proteobacterial OTUs (>1% of total sequences in at least on sample) obtained from La Crouen springs.**

| OTUs<br>(Accession<br>number) | Closest cultivated relative retrieved from NCBI nucleotide database |                                                   |                 | % of sequences per samples |        |            |            |        |        |        |        |        |        |            |        |
|-------------------------------|---------------------------------------------------------------------|---------------------------------------------------|-----------------|----------------------------|--------|------------|------------|--------|--------|--------|--------|--------|--------|------------|--------|
|                               | Species (Accession number)                                          | Taxonomy (Phylum, order, family)                  | Identity<br>(%) | CANBS1                     | CANBS2 | CANBW<br>1 | CANBW<br>2 | CANPS1 | CANPS2 | CANPW1 | CANPW2 | CANAS1 | CANAS2 | CANAW<br>1 | CANAW2 |
| OTU_170<br>(MW801417)         | <i>Paludibaculum fermentans</i><br>(NR_134120)                      | Acidobacteria; Solibacterales; Bryobacteraceae    | 92              | 0.9                        | 1.1    | 0.0        | 0.0        | 0.0    | 0.1    | 0.0    | 0.0    | 0.1    | 0.2    | 0.0        | 0.0    |
| OTU_93<br>(MW801406)          | <i>Lentimicrobium saccharophilum</i><br>(MG264204)                  | Bacteroidetes; Bacteroidales; Lentimicrobiaceae   | 94              | 1.6                        | 0.3    | 0.0        | 0.0        | 0.2    | 0.3    | 0.0    | 0.0    | 1.3    | 0.4    | 0.5        | 0.5    |
| OTU_120<br>(MW801410)         | <i>Lentimicrobium saccharophilum</i><br>(NR_149795)                 | Bacteroidetes; Bacteroidales; Lentimicrobiaceae   | 89              | 1.7                        | 0.4    | 0.0        | 0.0        | 0.3    | 0.5    | 0.0    | 0.0    | 2.1    | 0.5    | 0.5        | 0.6    |
| OTU_39<br>(MW801394)          | <i>Anaerophaga</i> sp. (KX930003)                                   | Bacteroidetes; Marinilabiales; Marinilabillaceae  | 99              | 0.2                        | 0.1    | 1.4        | 1.1        | 5.6    | 3.4    | 1.7    | 1.3    | 1.3    | 1.0    | 0.1        | 0.1    |
| OTU_72<br>(MW801400)          | <i>Prolixibacter bellariivorans</i><br>(LC015091)                   | Bacteroidetes; Marinilabiales; Prolixibacteraceae | 86              | 0.0                        | 0.0    | 0.5        | 2.9        | 0.0    | 0.0    | 0.0    | 0.0    | 0.0    | 0.0    | 1.7        | 2.5    |
| OTU_92<br>(MW801405)          | <i>Sunxiuqinia faeciviva</i><br>(NR_108114)                         | Bacteroidetes; Marinilabiales; Prolixibacteraceae | 92              | 3.9                        | 1.2    | 0.0        | 0.0        | 0.6    | 1.0    | 0.0    | 0.0    | 0.5    | 0.2    | 0.0        | 0.1    |
| OTU_99<br>(MW801407)          | <i>Raineyia orbicola</i> (MF125288)                                 | Bacteroidetes; Cytophagales; Raineyaceae          | 89              | 0.0                        | 0.0    | 0.6        | 1.2        | 0.4    | 0.0    | 0.0    | 0.0    | 0.1    | 0.1    | 1.9        | 2.5    |
| OTU_79<br>(MW801403)          | <i>Bellilinea caldifistulae</i><br>(NR_041354)                      | Chloroflexi; Anaerolineales; Anaerolineaceae      | 98              | 1.3                        | 2.2    | 0.0        | 0.0        | 0.5    | 0.6    | 0.0    | 0.0    | 1.7    | 3.4    | 0.0        | 0.0    |
| OTU_53<br>(MW801397)          | <i>Leptolinea tardivitalis</i><br>(NR_040971)                       | Chloroflexi; Anaerolineales; Anaerolineaceae      | 90              | 0.1                        | 0.1    | 2.1        | 1.2        | 0.3    | 0.2    | 1.8    | 2.4    | 0.3    | 0.1    | 0.0        | 0.0    |
| OTU_156<br>(MW801416)         | <i>Thermomarinilinea lacunifontana</i><br>(NR_132293)               | Chloroflexi; Anaerolineales; Anaerolineaceae      | 89              | 0.8                        | 2.2    | 0.0        | 0.0        | 0.0    | 0.1    | 0.0    | 0.0    | 0.1    | 0.2    | 0.0        | 0.0    |
| OTU_138<br>(MW801413)         | <i>Caldilinea tarbellica</i> (NR_117797)                            | Chloroflexi; Caldilineales; Caldilineaceae        | 94              | 0.3                        | 1.7    | 0.0        | 0.0        | 0.0    | 0.0    | 0.0    | 0.0    | 0.4    | 1.6    | 0.0        | 0.0    |
| OTU_75<br>(MW801401)          | <i>Litorilinea aerophila</i> (NR_132330)                            | Chloroflexi; Caldilineales; Caldilineaceae        | 89              | 3.0                        | 3.9    | 0.0        | 0.0        | 0.0    | 0.0    | 0.0    | 0.0    | 0.0    | 0.0    | 0.0        | 0.0    |
| OTU_10190<br>(MW801428)       | <i>Litorilinea aerophila</i> (NR_132330)                            | Chloroflexi; Caldilineales; Caldilineaceae        | 87              | 2.0                        | 1.9    | 0.0        | 0.0        | 0.0    | 0.0    | 0.0    | 0.0    | 0.0    | 0.0    | 0.0        | 0.0    |
| OTU_101<br>(MW801408)         | <i>Calothrix</i> sp. (MT350509)                                     | Cyanobacteria; Nostocales; Calotrichaceae         | 94              | 0.0                        | 0.0    | 2.1        | 3.0        | 0.0    | 0.0    | 0.0    | 0.0    | 0.0    | 0.0    | 0.0        | 0.0    |
| OTU_121<br>(MW801411)         | <i>Ancylothrix terrestris</i> (KT819202)                            | Cyanobacteria; Oscillatoriales; Phormidiaceae     | 98              | 0.7                        | 0.2    | 0.0        | 0.0        | 0.5    | 2.1    | 0.0    | 0.0    | 0.1    | 0.1    | 0.3        | 0.9    |
| OTU_57<br>(MW801398)          | <i>Leptolyngbya</i> sp. (MF405393)                                  | Cyanobacteria; Synechococcales; Leptolyngbyaceae  | 98              | 8.7                        | 2.0    | 0.2        | 0.2        | 0.0    | 0.0    | 0.0    | 0.0    | 2.6    | 1.2    | 0.5        | 0.7    |
| OTU_8<br>(MW801391)           | <i>Meiothermus ruber</i> (KC252987)                                 | Deinococcus-Thermus; Thermales; Thermaceae        | 98              | 5.6                        | 14.9   | 0.3        | 1.0        | 0.6    | 0.9    | 0.0    | 0.0    | 9.0    | 19.8   | 0.2        | 0.2    |
| OTU_83<br>(MW801404)          | <i>Candidatus Aminicenantes</i><br>(MK067121)                       | Aminicenantes (candidate phylum OP8)              | 100             | 3.5                        | 4.3    | 0.0        | 0.0        | 0.0    | 0.0    | 0.0    | 0.0    | 0.0    | 0.0    | 0.0        | 0.0    |
| OTU_52<br>(MW801396)          | <i>Candidatus Gracilibacteria</i><br>(CP042461)                     | Candidatus Gracilibacteria                        | 92              | 0.0                        | 0.0    | 12.0       | 9.9        | 0.0    | 0.0    | 17.7   | 17.1   | 0.0    | 0.0    | 0.2        | 0.1    |
| OTU_127<br>(MW801412)         | <i>Thermodesulfovibrio yellowstonii</i><br>(NR_074345)              | Nitrospirae; Nitrospirales; Nitrospiraceae        | 89              | 1.2                        | 0.5    | 0.0        | 0.0        | 0.0    | 0.1    | 0.0    | 0.0    | 1.5    | 2.0    | 0.0        | 0.0    |
| OTU_148<br>(MW801414)         | <i>Thermodesulfovibrio hydrogeniphilus</i> (NR_044075)              | Nitrospirae; Nitrospirales; Nitrospiraceae        | 87              | 0.3                        | 0.2    | 0.0        | 0.0        | 0.9    | 0.8    | 0.0    | 0.0    | 1.0    | 0.9    | 0.1        | 0.1    |
| OTU_51<br>(MW801395)          | <i>Thermodesulfovibrio yellowstonii</i><br>(NR_074345)              | Nitrospirae; Nitrospirales; Nitrospiraceae        | 89              | 0.5                        | 0.6    | 0.0        | 0.0        | 0.2    | 0.7    | 0.0    | 0.0    | 5.0    | 7.0    | 0.0        | 0.0    |
| OTU_60<br>(MW801399)          | <i>Leptospira alexanderi</i> (JQ988836)                             | Spirochaetes; Leptospirales; Leptospiraceae       | 90              | 0.1                        | 0.0    | 0.0        | 0.0        | 0.0    | 0.0    | 0.0    | 0.0    | 0.7    | 0.1    | 6.5        | 6.7    |

|                       |                                                    |                                                                                          |    |     |     |     |     |     |     |     |     |     |     |     |     |
|-----------------------|----------------------------------------------------|------------------------------------------------------------------------------------------|----|-----|-----|-----|-----|-----|-----|-----|-----|-----|-----|-----|-----|
| OTU_212<br>(MW801424) | <i>Pedospira parvula</i> (AY960777)                | <i>Verrucomicrobia; Verrucomicrobiales</i>                                               | 86 | 1.1 | 0.4 | 0.0 | 0.0 | 0.4 | 0.2 | 0.0 | 0.0 | 0.4 | 0.2 | 0.0 | 0.0 |
| OTU_193<br>(MW801421) | <i>Methanobacterium subterraneum</i><br>(CP017768) | <i>Euryarchaeota; Methanobacteria; Methanobacteriales;</i><br><i>Methanobacteriaceae</i> | 99 | 0.5 | 1.3 | 0.0 | 0.0 | 0.0 | 0.3 | 0.0 | 0.0 | 0.0 | 0.1 | 0.0 | 0.0 |
| OTU_178<br>(MW801418) | <i>Methanobacterium oryzae</i><br>(NR_028171)      | <i>Euryarchaeota; Methanobacteria; Methanobacteriales;</i><br><i>Methanobacteriaceae</i> | 99 | 0.2 | 1.1 | 0.0 | 0.0 | 0.0 | 0.9 | 0.0 | 0.0 | 0.0 | 0.2 | 0.0 | 0.0 |
| OTU_186<br>(MW801420) | <i>Methanosaeta pelagica</i><br>(NR_113571)        | <i>Euryarchaeota; Methanomicrobium; Methanosarcinales;</i><br><i>Methanosaetaceae</i>    | 96 | 2.0 | 1.0 | 0.0 | 0.0 | 0.0 | 0.0 | 0.0 | 0.0 | 0.0 | 0.0 | 0.0 | 0.0 |
| OTU_106<br>(MW801409) | <i>Methanosaeta harundinacea</i><br>(KP231498)     | <i>Euryarchaeota; Methanomicrobium; Methanosarcinales;</i><br><i>Methanosaetaceae</i>    | 98 | 4.2 | 1.9 | 0.0 | 0.0 | 0.0 | 0.0 | 0.0 | 0.0 | 0.5 | 0.7 | 0.0 | 0.0 |
